# Supplementary material
Source: PubMed Central journal article supplement (PMC5710375)
Supplement: jama-318-1876-s001.pdf [file jama-318-1876-s001.pdf]

## The Investigator's Protocol

1. **Title:** Randomized trial of sertraline treatment of depression in Chronic Kidney Disease
2. **Principal Investigator:** Susan Hedayati, MD, MHSc, Nephrology
3. **Sponsor of the Study:** No sponsor. **Sources of funds:** NIDDK R01 and VA MERIT Review
4. **Investigational New Drug/Device Exemption:** N/A
5. **Purpose of the Study and Hypotheses to be Tested:**

Chronic kidney disease (CKD) is a major public health problem (1) associated with excessive cardiovascular (CV) morbidity and mortality (2, 3). In our previous study of 272 predialysis CKD patients, we discovered that 21% suffer from a major depressive episode (MDE) and that MDE is an independent predictor of dialysis initiation, hospitalization and death. We and others showed that only a minority (16 to 39%) of CKD patients with depression are treated with antidepressant medications (9, 14, 15). Reasons for low treatment rates include a serious lack of published studies that support or refute efficacy and safety of antidepressant medication use in CKD patients. The Sertraline AntiDepressant Heart Attack Randomized Trial demonstrated benefit of antidepressant medication on CV outcomes (16). Unfortunately, this study excluded patients with moderate to severe CKD, precisely those who are at higher risk for both depression and poor CV outcomes. The purpose of the study is to determine the short-term safety and efficacy of antidepressant medications in CKD patients with a MDE as a first step to determine the feasibility of conducting a large-scale trial designed to investigate whether the treatment of depression improves quality of life and survival in patients with CKD.

**Hypotheses:** We hypothesize that short-term treatment of a major depressive episode (MDE) with serotonin-selective reuptake inhibitor (SSRI) sertraline will improve depression symptom severity in patients with predialysis stages 3-5 CKD and will improve short-term outcomes such as quality of life. We further hypothesize that short-term treatment of MDE with sertraline is safe and tolerable in CKD patients.

### Specific Objectives:

1. **Determine if treatment with sertraline, as compared with placebo, results in an improvement in depression severity** as measured by the Quick Inventory of Depressive Symptomatology Clinician Rated (QIDS-C-16) score in 200 adults with predialysis stages 3-5 CKD and MDE. Subjects will be randomized in a double-blind fashion to placebo or sertraline (beginning at 50 mg/d and escalated by 50 mg every 2 weeks to a maximum of 200 mg/d) and followed for 12 weeks. This study will have 80% power to detect a 0.5 effect size assuming a two-sided- $\alpha$  of 0.05. Secondary outcomes are response to treatment defined as a decline of  $\geq 50\%$  in the baseline QIDS-C-16 and depression remission defined as a QIDS-C-16 score  $\leq 5$ .
2. **Determine if sertraline treatment vs. placebo improves overall function and QOL**, as assessed by the Work and Social Adjustment Scale (WSAS) and Kidney Disease QOL Survey (KDQOL-SF), respectively. Aim 2 is also a secondary outcome. Other exploratory aims are to:
  3. **Determine if treatment with sertraline, as compared with placebo, is safe and tolerable.** This will be assessed by: a. proportion in each group with serious adverse events; b. type, severity and frequency of side effects; c. reduction in platelet aggregation in sertraline vs. placebo group, and whether this reduction correlates with higher plasma sertraline levels.
  4. **Investigate mechanisms by which sertraline may affect outcomes.** We will determine if sertraline treatment vs. placebo will improve: a. nutritional status; b. adherence to prescribed medications; c. cognitive functioning; and d. markers of inflammation.
  5. **Collect data on death, hospitalizations, and dialysis initiation at 6 and 12 months after randomization for power calculations to determine** the feasibility of conducting a large-scale trial designed to investigate whether the treatment of depression improves outcomes in CKD.

51 **6. Background and Results of Previous Related Research:**

52 **(a) Background:** Depression is more common among patients with CKD as compared to those  
53 without CKD. Whereas depression point prevalence is 2-4% in the general community and 5-  
54 10% in the primary care setting (18), 20% of CKD patients suffer from depression (9, 13, 27).  
55 This prevalence is even higher than that reported for other chronic diseases (24, 25). In  
56 addition, depression in CKD patients on chronic hemodialysis (HD) is an independent risk factor  
57 for both morbidity and mortality (10-13). HD patients with depression are twice as likely to die or  
58 require hospitalization within a year as compared to those without depression (10). Depression  
59 in dialysis is associated with a 30% increase in both cumulative hospital days and number of  
60 hospitalizations, which in turn contributes to excessive Medicare costs (11). There is a direct  
61 relationship between depressive symptoms and non-adherence to diet and interdialytic weight  
62 gain in HD patients (48-50). Decreased behavioral compliance is in turn associated with  
63 decreased survival (30). It is, therefore, importance to recognize depression as a risk factor for  
64 poor outcomes among patients who may not be adhering to medical advice (32) and  
65 investigating whether treatment of depression would result in a difference.

66 However, serious knowledge gaps exist with respect to depression in the CKD population.  
67 Antidepressant treatment rates are low and safety and efficacy are not established. Only a  
68 minority of HD patients receive adequate diagnosis and therapy for depression (9, 14, 15, 42).  
69 Under-treatment of depression and under-dosing of antidepressants may be due to  
70 nephrologists' concerns about adverse effects, since there is a paucity of data regarding the  
71 safety of antidepressants as such patients are generally excluded from antidepressant trials due  
72 to concerns for safety (16, 43). These include increased risk of drug-drug interactions;  
73 accumulation of toxic metabolites with decreased renal clearance; central nervous system  
74 depression and increased risk of bleeding, which becomes particularly problematic in patients  
75 with advanced CKD and underlying qualitative platelet defects related to uremia (16, 42-46).

76 There is insufficient evidence to clearly suggest that treatment of major depression is efficacious  
77 or changes outcomes in CKD patients (9, 28, 48). Few studies have examined this issue and  
78 are fraught with serious problems including insufficient sample size, (48-52), lack of placebo-  
79 control (48-50, 52, 53) and lack of DSM IV-based gold-standard criteria for depression diagnosis  
80 (50, 51, 53). Nonrandomized observational studies of antidepressant therapy in CKD patients  
81 on chronic peritoneal dialysis reported some improvement in depressive symptoms (48);  
82 however, major limitations included the lack of a control group, selection and refusal bias, and a  
83 50% drop-out rate. In another study, 14 HD patients with major depression were randomized to  
84 fluoxetine or placebo in a double-blind fashion (51). There was a statistically significant  
85 improvement in depression at 4 but not at 8 weeks. Further, the sample was too small to clearly  
86 identify adverse effects and follow-up was not very long. Finally, non-pharmacological treatment  
87 of depression, such as exercise, psychotherapy, and cognitive behavioral therapy have met with  
88 very limited success (52, 54-56). The discouraging lack of sufficient published data calls for a  
89 randomized placebo-controlled trial where subjects are consecutively recruited and outcomes  
90 are blindly assessed. *Our proposed trial will fill this gap in knowledge by establishing the safety,*  
91 *tolerability and efficacy of sertraline for depression treatment in patients with CKD in a*  
92 *randomized double-blinded placebo-controlled trial (Specific Aim 1 and 3).*

93 Finally, it is not known whether treatment of depression improves outcomes. Given the  
94 excessive morbidity and mortality of CKD patients (2, 3) and the failure of interventions to alter  
95 mortality (6-8), it is plausible that depression is a crucial component in the causal pathways to  
96 morbidity and mortality in the CKD population. This project will provide ground-breaking  
97 information needed to determine whether pharmacologic intervention for treatment of  
98 depression in CKD patients can improve their dismal outcomes. Importantly, depression also  
99 results in substantial decrease in quality of life (QOL) and functional impairment in patients with  
100 CKD (53, 57-59), and levels of depression and functional and occupational impairment do not  
101 remit spontaneously in untreated depressed patients (60). *Our proposed trial will fill this gap in  
102 knowledge by establishing whether the SSRI sertraline treatment of depression in CKD patients  
103 will improve overall function and QOL and elucidate mechanisms by which treatment may  
104 improve clinical outcomes (Specific Aims 2 and 4).*

105 **(b) Significance:** Major depression is a common, under-recognized and under-treated problem  
106 that is independently associated with markedly increased risk for both morbidity and mortality in  
107 CKD patients. There are no properly controlled trials of safety and efficacy of antidepressant  
108 medication treatment and no studies on effects of treatment on outcomes in this population.  
109 Treatment of depressed patients after acute coronary syndrome with sertraline was associated  
110 with a trend toward improved CV outcomes in the Sertraline AntiDepressant Heart Attack  
111 Randomized Trial (SADHART) (16, 41). *Given the excessive rates of CV death in CKD patients  
112 (2, 3), and the correlation of depression with increased CV events (20-23), it becomes  
113 imperative to not only investigate whether treatment of depression is efficacious in these  
114 patients, but also whether it would result in a reduction in CV mortality.* Accomplishing the aims  
115 of this proposal will establish the safety and efficacy of SSRI antidepressant medication use in  
116 CKD patients and *form the basis of future large trials to investigate whether treatment of  
117 depression in this population would impact their poor clinical outcomes.* Dissemination of results  
118 would affect clinical practice and encourage SSRI use in depressed CKD patients, with resultant  
119 improvement in depressive symptoms and QOL in this chronically ill population. Depression has  
120 become a U.S. public health priority. The U.S. Preventive Services Task Force recommends  
121 screening adult patients for depression if practices “have systems in place to assure accurate  
122 diagnosis, effective treatment and follow-up” (61). Without establishing the efficacy of  
123 antidepressants in CKD, screening for depression in this population who is at an increased risk  
124 for depression and suffers adverse outcomes resulting from depression would not be feasible.

125 **(c) Relevance to Veterans Health:** Prior research has shown that deployment stressors and  
126 exposure to combat result in considerable risks of mental health problems, including major  
127 depression, post-traumatic stress disorder (PTSD), substance abuse, and impairment in social  
128 functioning and in the ability to work among Veterans (62-64). In one study of 602 first Gulf War  
129 Veterans, 32% met criteria for current or lifetime depressive disorder (65). Given the high  
130 prevalence of both depression and cardiovascular disease in Veterans, the Veterans Affairs  
131 (VA) patient population provides a unique opportunity to address the research questions  
132 proposed above. Mental health disorders are not only prevalent among Veterans, but result in  
133 increased utilization of health care services (62, 66, 67) and, therefore, health care-related  
134 costs. Efficacious treatment of depression with SSRIs in these patients by primary care  
135 physicians and nephrologists in turn may lessen the use of health care resources and perhaps  
136 lead to overall decreased health care costs.

137 **(d) Works Accomplished:**

138

139 1)Knowledge Gap: To our knowledge, there are no published data using a DSM IV-based gold  
 140 standard to define the prevalence of a MDE blindly and consecutively in predialysis CKD  
 141 patients. Knowing the disease point prevalence becomes important in determining the feasibility  
 142 of recruitment and conducting power calculations for clinical trials of depression treatment.

143 **Methods:** We consecutively recruited  
 144 272 patients with predialysis Stages  
 145 2-5 CKD from the Dallas VA  
 146 outpatient CKD clinic to define the  
 147 point prevalence of a current MDE  
 148 using the DSM IV-based Mini  
 149 International Neuropsychiatric  
 150 Interview (MINI) (72).

151 **Results:** Fifty-seven of the 272

152 subjects or 21% met criteria for a current MDE. The presence of a MDE did not vary based on  
 153 severity of kidney disease (CKD stage). **Table 1** lists variables associated with a MDE.

154 **Conclusions:** Twenty percent of patients with predialysis CKD has a current MDE and the  
 155 prevalence does not vary based on CKD stage. Unemployment, presence of diabetes, and  
 156 other psychiatric illness are associated with a current MDE in CKD patients.

157

158 2)Knowledge Gap: There are limited data regarding the psychometric properties and validation  
 159 of self-report depression screening tools  
 160 among patients with predialysis CKD. This  
 161 makes it not only difficult to formally screen  
 162 and diagnose patients in the clinical setting,  
 163 but also accurately identify subjects with a  
 164 MDE for enrollment into trials.

165 **Methods:** All the 272 CKD subjects  
 166 completed the Beck Depression Inventory  
 167 (BDI) and 16-item Quick Inventory of  
 168 Depressive Symptomatology–Self-report  
 169 scale (QIDS-SR-16) (115). The MINI was  
 170 administered to all by trained persons  
 171 blinded to self-report scores. ROC curves

172 derived optimal cutoffs on BDI and QIDS-SR-16 for ascribing a MDE by MINI.

173 **Results:** The cutoff with the best diagnostic accuracy was  $\geq 10$  for the QIDS-SR-16 and  $\geq 11$  for  
 174 the BDI. See **Figure 1** for QIDS-SR-16 ROC curve, and **Table 2** for the sensitivities and  
 175 specificities, positive and negative predictive values and positive and negative likelihood ratios.

176 The agreement between the optimal cutoffs of the BDI and the QIDS-SR-16 and the MINI MDE  
 177 diagnosis were both moderate, with Kappa coefficients of 0.7, 95% CI (0.6-0.8).

**Table 1 Unemployment, diabetes and co-morbid psychiatric illness are associated with a major depressive episode in CKD**

| Variable                         | Odds Ratio (95% CI) |
|----------------------------------|---------------------|
| Age, per year increase           | 0.97 (0.94, 1.01)   |
| Employed                         | 0.19 (0.05, 0.66)   |
| Diabetes mellitus                | 2.17 (1.06, 4.45)   |
| Co-morbid psychiatric illness    | 11.40 (4.64, 27.98) |
| History of drug or alcohol abuse | 1.30 (0.62, 2.74)   |

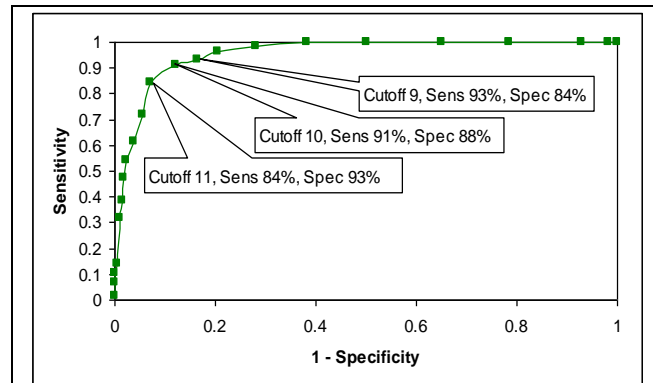

**Figure 1 The best QIDS-SR-16 cutoff for major depressive episode is 10 in CKD patients by ROC curve analysis.**

**Table 2 Screening Characteristics of Beck Depression Inventory and Quick Inventory of Depressive Symptomatology Scale**

| Scale Cutoff         | Sensitivity   | Specificity   | PPV           | NPV           | + LR             | - LR               |
|----------------------|---------------|---------------|---------------|---------------|------------------|--------------------|
| BDI $\geq 11$        | 89% (78%-96%) | 88% (83%-92%) | 67% (55%-77%) | 97% (93%-99%) | 7.58 (7.35-7.81) | 0.12 (0.118-0.125) |
| QIDS-SR-16 $\geq 10$ | 91% (80%-97%) | 88% (83%-92%) | 67% (55%-77%) | 97% (94%-99%) | 7.45 (7.23-7.66) | 0.10 (0.097-0.103) |

178

179 **Conclusions:** Although optimal cutoffs on the BDI and the QIDS-SR-16 have high positive  
 180 likelihood ratios making them acceptable screening tools, they don't perform well as diagnostic

181 tools for identifying a MDE given the moderate kappa values. Confirmation of diagnosis by a  
 182 DSM IV-based interview, i.e. MINI, is needed prior to enrollment into depression treatment trials.  
 183

184 3) Knowledge Gap: Although it is  
 185 established that depression is  
 186 associated with poor outcomes  
 187 in CKD patients on chronic  
 188 dialysis, there are no published  
 189 data to demonstrate whether a  
 190 similar relationship exists in  
 191 patients with CKD prior to the  
 192 initiation of chronic dialysis.

193 **Methods**: The 272 VA patients  
 194 with predialysis CKD were  
 195 prospectively followed for 12  
 196 months. Both survival analysis  
 197 and logistic regression were  
 198 used to assess the independent  
 199 association of a MDE with the  
 200 primary outcome, which was a  
 201 composite of death,  
 202 hospitalization or dialysis  
 203 initiation. Secondary outcomes  
 204 were each of these outcomes assessed separately.

205 **Results**: One-hundred and twenty-seven patients had at least one event (death, hospitalization  
 206 or dialysis initiation). Percent of composite events was significantly higher among the subjects  
 207 with a MDE as compared to those without a MDE (63.0% vs. 44.9%, respectively, *P*-value 0.02).  
 208 Mean survival time based on the composite event was 206.5 days ( $\pm 19.8$  days) for those with a

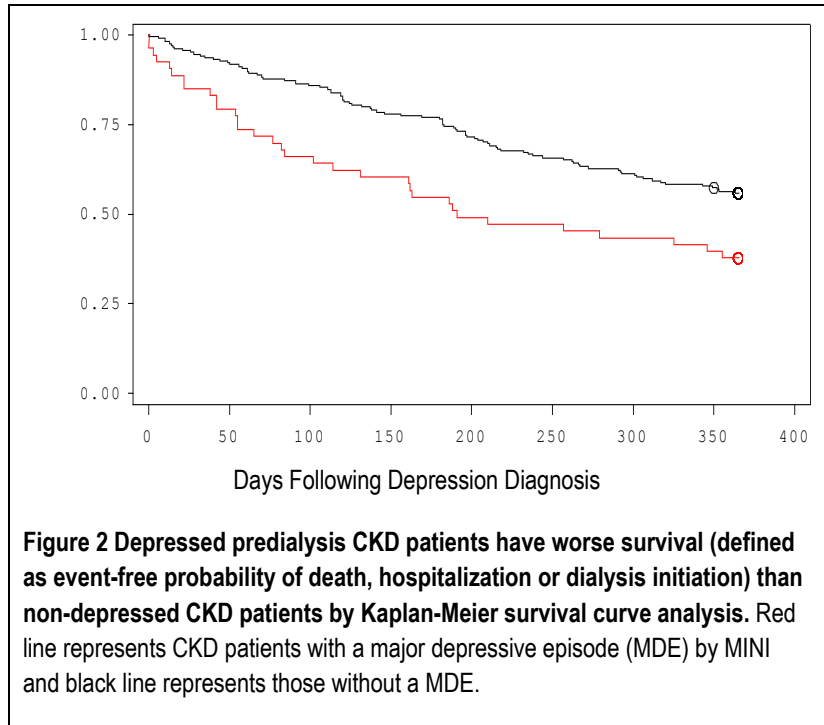

209 MDE, and 273.3 ( $\pm 8.5$ ) for those without  
 210 MDE (Log-rank statistic *P*-value 0.003).  
 211 **Figure 2** is the Kaplan-Meier survival

**Table 3 Depressed CKD patients are twice as likely to die, get hospitalized or start dialysis as those non-depressed.**

| Variable                             | Hazard Ratio (95% CI) |
|--------------------------------------|-----------------------|
| Depression Diagnosis                 | 1.85 (1.22, 2.81)     |
| Age, per year increase               | 0.98 (0.96, 0.99)     |
| White race                           | 1.90 (1.26, 2.89)     |
| CKD Stage 3 vs. 2                    | 3.25 (0.77, 13.73)    |
| CKD Stage 4 vs. 2                    | 3.40 (0.81, 14.35)    |
| CKD Stage 5 vs. 2                    | 8.24 (1.84, 36.89)    |
| Co-morbidity, per number increase    | 1.22 (1.07, 1.40)     |
| Diabetes mellitus                    | 0.99 (0.66, 1.50)     |
| Albumin, g/dl, per unit decrease     | 2.04 (1.36, 3.08)     |
| Hemoglobin, g/dl, per unit decrease  | 1.18 (1.06, 1.33)     |
| Phosphorus, mg/dl, per unit increase | 1.08 (0.88, 1.33)     |

212  
 213  
 214  
 215  
 216  
 217  
 218  
 219 **Figure 2** is the Kaplan-Meier survival  
 220 curve for the primary outcome measure.  
 221 CKD patients with a MDE had twice the  
 222 hazard of dying, getting hospitalized or  
 223 initiating chronic dialysis within a year of  
 224 depression diagnosis as those without a  
 225 MDE in both univariate and multivariable  
 Cox Proportional Hazards models (**Table 3**).

**Conclusions**: Predialysis CKD patients with a current MDE diagnosed using a gold-standard interview are twice as likely to die, get hospitalized or initiate dialysis as those without a MDE, as well as an increased odd of getting hospitalized

226 approximately by 3-fold and initiating chronic dialysis by 7-fold within 12 months of MDE  
 227 diagnosis (latter data not shown).  
 228

229 4) Knowledge Gap: Data regarding the efficacy of SSRIs in treating a MDE in CKD is lacking.

230  
231 **Methods:** Of our cohort of 57 subjects diagnosed with a current MDE by the gold standard MINI  
232 (107-110), 15 participants were prescribed an SSRI at the time of diagnosis. These subjects  
233 were those who had an uncomplicated MDE (i.e. no psychosis), did not have suicidal ideation,  
234 were not taking any antidepressant medications at enrollment, and agreed to be started on  
235 medication for depression. The SSRI used for each subject was chosen as part of their  
236 individually-tailored clinical care. Seven subjects were prescribed sertraline 25 mg once daily  
237 and were told to increase the dose to 50 mg once daily after 7 days if they were tolerating the  
238 medication. Five subjects were prescribed citalopram 20 mg once daily, 2 were prescribed  
239 citalopram 10 mg once daily and one subject was started on fluoxetine 20 mg once daily. The  
240 QIDS-SR-16 was administered to all subjects at the time of MDE diagnosis and before anti-  
241 depressant medication was prescribed and again after 6 months.

242 **Results:** The mean QIDS-SR-16 score at baseline was 14.07 ( $\pm 4.07$ ) and was reduced to 8.47  
243 ( $\pm 4.47$ ) at 6 mo. The mean difference between baseline and 6-month QIDS-SR-16 score was  
244 significant,  $-5.60$  ( $\pm 4.07$ ),  $P$ -value 0.0001. None of the subjects reported any adverse events.

245 **Conclusions:** Although this pilot is limited by the lack of formal assessment for compliance with  
246 SSRIs and by the lack of a placebo control group, the data showed an improvement in  
247 depression symptom severity and allows for sample size calculations for our proposed study.  
248

249 **7. Definition of Population to Which the Study is Directed, with Justification:** Subjects with  
250 moderate to severe CKD Stages 3-5 but not yet initiated on chronic dialysis who meet DSM IV  
251 criteria (17, 80) for a Major Depressive Episode (MDE) will be enrolled. We will focus the trial on  
252 predialysis CKD and not End-Stage Renal Disease (ESRD) patients already on chronic dialysis  
253 because CKD affects a substantially larger proportion of the U.S. population as compared with  
254 ESRD, and because it is not known how dialysis initiation may affect the presence of  
255 depression. Increased depressive symptoms may occur due to the loss of bodily function, loss  
256 of role at work and in family and dependence on the dialysis procedure (28). Although both men  
257 and women are affected by CKD and MDE, most patients seen at the Dallas VAMC are men.  
258 However, women will not be systematically excluded. The racial and ethnic diversity of patients  
259 seen at the Dallas VAMC will ensure inclusion of minorities. Children will not be included. Safety  
260 and efficacy of anti-depressants should be established in adults with CKD before testing their  
261 use in children with CKD given potential risks.

262 **8. Subject Selection, Inclusion and Exclusion Criteria:** Waiver of HIPAA authorization will be  
263 used to select potential subjects by pre-screening Dallas VAMC outpatient clinic rosters for  
264 eligibility criteria. Those eligible will be contacted by phone or a letter and invited to a screening  
265 visit to fill out the QIDS-SR-16 depression self-report scale. If they score  $\geq 11$ , they will be asked  
266 to participate in the study or offered alternative management of depression if they refuse.

267 **Inclusion Criteria:**

- 268 1) Male or female adults 21 years or older. There will be no upper age limit.  
269 2) Presence of stages 3, 4 or 5 CKD based on the National Kidney Foundation definition as  
270 an estimated glomerular filtration rate (GFR) of  $< 60$  mL/min/1.73 m<sup>2</sup> for a period of at  
271 least 3 months (5). Stage 5 patients are eligible only if not initiated on dialysis or  
272 recipient of kidney transplantation. The estimated GFR will be determined using the four-  
273 variable Modification of Diet for Renal Disease Study formula (82).  
274 3) Presence of a current MDE based on MINI DSM IV-based criteria (72)  
275 4) Quick Inventory of Depressive Symptomatology–Self-report (QID-SR-16) score of  $\geq 11$  at  
276 enrollment and  $\geq 11$  on QIDS-C-16 (QIDS-Clinician rated) at randomization.

277 5) Able to understand and sign informed consent after the study has been fully explained

278  
279 **Exclusion Criteria:** Patients will be excluded if they have co-morbid medical or psychiatric  
280 conditions that would put them at risk with the use of sertraline, or if on concomitant medications  
281 with potential drug interactions with sertraline (16, 45).

- 282 1) No healthcare power of attorney to sign informed consent
- 283 2) Unwilling or unable to participate in the protocol or comply with any of its components
- 284 3) Kidney transplant recipient
- 285 4) Initiated on maintenance dialysis
- 286 5) Significant hepatic dysfunction or liver enzyme abnormalities  $\geq 3$  times the upper limits of normal
- 287 6) Terminal chronic obstructive pulmonary disease or cancer
- 288 7) Recent history of active bleeding, such as gastrointestinal bleeding requiring hospitalization  
289 3 months prior
- 290 8) Current use of class I anti-arrhythmic medications (such as 1C propafenone and flecainide) (45)
- 291 9) Use of pimozide, MAO inhibitors, reserpine, guanethidine, cimetidine or methyldopa; tri-  
292 cyclic anti-depressants, neuroleptics or anti-convulsants (excluding gabapentin, as it has no  
293 significant drug interactions with sertraline and is commonly used in diabetic CKD patients  
294 with diabetic neuropathy) (45).
- 295 10) Use of other serotonergic drugs or supplements such as triptans, tramadol, linezolid,  
296 tryptophan, and St. John's Wort.
- 297 11) Ongoing use of anti-depressants
- 298 12) Past treatment failure on Sertraline
- 299 13) Initiation of psychotherapy for depression in the 3 months prior to study entry
- 300 14) Alcohol or substance abuse or dependence that requires acute detoxification at study entry
- 301 15) Present or past psychosis or Bipolar I or II disorder
- 302 16) Dementia or a Mini-Mental State Examination score of  $<23$
- 303 17) Suicidal intent
- 304 18) Pregnancy, lactation and women of childbearing potential not using adequate contraception

305  
306 **9. Number of subjects in the Study:** Two hundred subjects will be enrolled. Since there are no  
307 prior studies on which to base an estimate of effect size, the sample size was selected to detect  
308 the smallest clinically meaningful effect size (88). Based on the primary hypothesis, we chose  
309 the relevant effect size to be the standardized difference between groups in change from  
310 baseline to exit in the QIDS-C-16 and the power to be based on a t-test comparison of this  
311 difference. Our preliminary data shows that 15 subjects with CKD and MDE started on a SSRI  
312 experienced a mean drop in QIDS-SR-16 of 5.6 with a standard deviation (SD) of 4.1. A  
313 difference of 2 points with a SD of 4 points gives an effect size of 0.5, which Cohen classifies as  
314 moderate (89). Given this effect size, a t-test will have 80% power to detect a 0.5 effect size with  
315 a sample of 128 subjects or 64 per sertraline and placebo groups (Table 1). If the SD should  
316 turn out to be larger, for example 5, the effect size would be 0.4 and a sample of 200 or 100 per  
317 group would be needed (Table 2). To be conservative, we request 200 subjects.

318 Table 1: Sample Size to Detect Various Effect Sizes (QIDS-C)

| Mean difference between groups | SD of Difference | Effect size | 80% Power  | 90% Power |
|--------------------------------|------------------|-------------|------------|-----------|
| 1.0                            | 4.0              | 0.25        | 506        | 676       |
| <b>2.0</b>                     | <b>4.0</b>       | <b>0.50</b> | <b>128</b> | 172       |
| 3.0                            | 4.0              | 0.75        | 58         | 78        |

|     |     |      |    |    |
|-----|-----|------|----|----|
| 4.0 | 4.0 | 1.00 | 34 | 46 |
| 5.0 | 4.0 | 1.25 | 24 | 30 |

319 Table 2: Sample Size to Detect Various Effect Sizes (QIDS-C)

| Mean difference between groups | SD of Difference | Effect size | 80% Power  | 90% Power |
|--------------------------------|------------------|-------------|------------|-----------|
| 1.0                            | 5.0              | 0.20        | 788        | 1054      |
| <b>2.0</b>                     | <b>5.0</b>       | <b>0.40</b> | <b>200</b> | 266       |
| 3.0                            | 5.0              | 0.60        | 90         | 120       |
| 4.0                            | 5.0              | 0.80        | 52         | 68        |
| 5.0                            | 5.0              | 1.00        | 34         | 46        |

320

321 **10. Justification for the Use of Vulnerable Populations: N/A**

322

323 **11. Study Design:** This is a randomized, double-blinded, placebo-controlled flexible-dose 12-  
324 week trial of treatment of MDE with sertraline involving 200 subjects with predialysis stages 3-5  
325 CKD (Figure 1). After signing informed consent, eligibility will be assessed by a structured  
326 psychiatric interview using the Diagnostic and Statistical Manual of Mental Disorders IV (DSM  
327 IV)-based Mini International Neuropsychiatric Interview (MINI) to determine if a current MDE is  
328 present (72, 80). This interview will be administered by a trained person blinded to subject  
329 medical history. The subject must also score  $\geq 11$  on the 16-item Quick Inventory of Depressive  
330 Symptomatology–Self-report (QID-SR-16) scale (76, 77) to be eligible. If eligible, the subject will  
331 be invited to enter a single-blinded one-week placebo run-in period (Period B) to monitor  
332 compliance prior to randomization. Those who are non-compliant, defined as the ingestion of  
333  $< 65\%$  or  $> 120\%$  of study drug, will be excluded. The subject will then enter the double-blind  
334 phase (Period C) and be randomly assigned to receive either sertraline at an initial dose of 50  
335 mg once daily or matching placebo in a 1:1 ratio, stratified by CKD stage. Subjects will be  
336 outpatients every 2 weeks for 6 weeks for titration of study drug and monitoring of side effects.  
337 The dosage of study drug will be increased at 2-week intervals based on tolerability and  
338 response, and can be decreased if intolerable side effects occur. For those specific subjects  
339 that do not tolerate the 50 mg/day dose, the dose will be decreased to 25 mg/day, but then  
340 uptitration of dose will occur per protocol every 2 weeks (50 mg to 100 mg, etc). The subject will  
341 be maintained on a constant dose of drug after the 6 week visit and reassessed for depressive  
342 symptoms during visits at weeks 9 and 12. At 12 weeks, tapering of study drug at the rate of 50  
343 mg per week will commence until drug is discontinued, which will take a maximum of 4 weeks  
344 (Period D). The subject will return for a final visit 2 weeks after discontinuation of study drug and  
345 be reassessed to see if further clinical follow-up is required for depression. See **Figure 1** for  
346 design diagram.



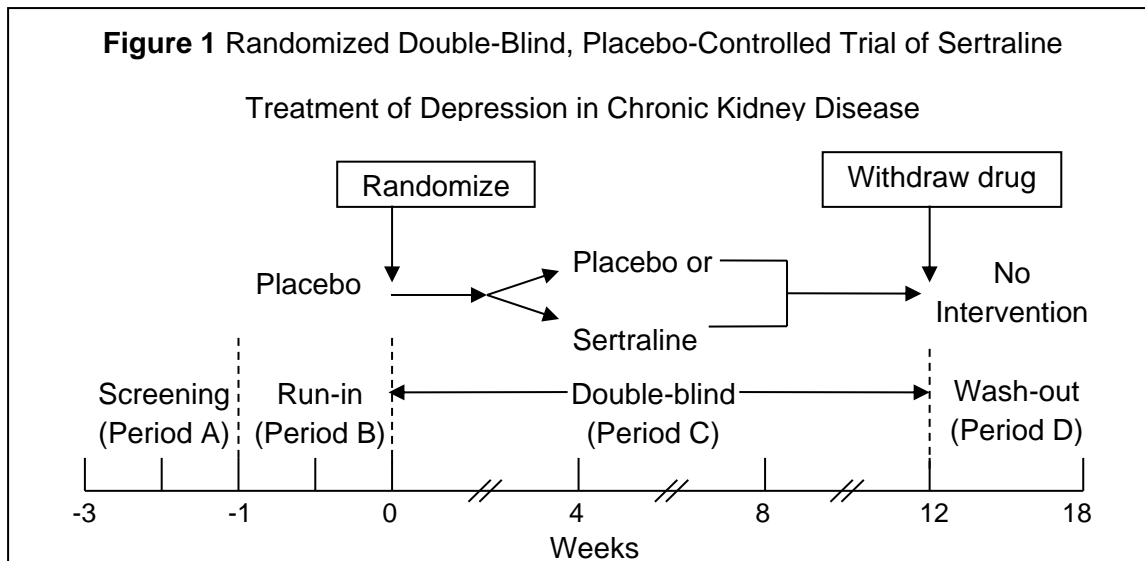

347

348 **12. Detailed Description of Study Procedures by Study Period:**

349 **a. Period A - Screening Visit (2 hours):** Clinic rosters will be reviewed prior to the clinic date to  
 350 identify patients for screening. Waiver of HIPAA authorization will be used to select potential  
 351 subjects by pre-screening Dallas VA outpatient clinic rosters and reviewing CPRS medical  
 352 records for eligibility criteria, which includes Chronic Kidney Disease with eGFR of <60 but not  
 353 on chronic dialysis. Those eligible will be asked in person to fill out the QIDS-SR-16 depression  
 354 self-report scale while they are waiting to be seen in clinic. If they score  $\geq 11$  they will be invited  
 355 to a screening visit to determine eligibility and sign informed consent. If they don't agree to  
 356 participate, they will be offered alternative options for formal evaluation and treatment of  
 357 depression. After signing consent, subjects will be administered the Mini-Mental Status  
 358 Examination and the Mini International Neuropsychiatric Interview (MINI) (72) to identify if a  
 359 current MDE exists and to exclude past or current psychotic disorder, alcohol or substance  
 360 abuse, or suicidal ideation. The MINI will be administered by a trained person blinded to subject  
 361 medical history. Those who score  $\geq 23$  on the Mini-Mental and meet MINI criteria for a MDE will  
 362 participate in the trial and will proceed to the run-in phase. A brief medical history and a physical  
 363 examination will be performed during the screening visit.

364 Time Window: A maximum of two weeks will be allowed for the time interval between screening,  
 365 determining eligibility and entering the run-in period.

366 **b. Period B - Single-Blinded One-Week Placebo Run-In Period:**

367 1) Rationale for run-in phase: A run-in phase, similarly utilized in the SADHART trial (16) is  
 368 designed for 2 reasons: a) to monitor compliance with study drug and to exclude non-compliant  
 369 subjects prior to randomization, given that depression has been associated with non-compliance  
 370 (30-32); b) to ensure that subjects still meet eligibility criteria by QIDS-C-16 score  $\geq 11$ .

371 2) Run-in Visit (1 visit, 2 hours): During the screening visit described above, subjects will be  
 372 given placebo tablets to take once daily starting the same day as the visit. Subjects will be  
 373 blinded to study drug and instructed to take the drug once daily in the evening prior to bedtime  
 374 between the hours of 8-10 pm. The protocol will allow change to morning dosing in cases that

375 the subject has trouble sleeping. Subjects will return in one week for a second visit (Run-in Visit)  
376 at which time they will be administered the 16-item Quick Inventory of Depressive  
377 Symptomatology-Clinician Rated (QIDS-C-16) scale (76, 77) QIDS-C-16 to ensure that they  
378 meet eligibility criteria defined as a score of  $\geq 11$ . Compliance to study drug will be ascertained  
379 by pill count. Those who are non-compliant, defined as the ingestion of  $<65\%$  or  $>120\%$  of study  
380 drug, will be excluded. The QIDS-C-16 will be administered by a trained person during this visit.  
381 This scale, which assesses the DSM IV-based 9 criterion symptom domains of major  
382 depression, will be used to measure the primary outcome. The score on this scale ascertained  
383 at the end of the run-in period prior to randomization will serve as the baseline score for  
384 comparison of outcome. Blood will be obtained for a complete metabolic panel, parathyroid  
385 hormone, complete blood count, prothrombin time, and partial thromboplastin time. Spot urine  
386 will be collected for urinalysis and urine protein-to-creatinine ratio, and 24h urine collected for  
387 creatinine, protein and urea nitrogen. A blood pregnancy test will be performed in women of  
388 childbearing age.

389 3) Time Window: A maximum of 6 to 12 days will be allowed between starting the run-in period  
390 and entering the double-blind phase.

### 391 **c. Period C - Double-Blind Phase:**

392 1) Randomization and blinding: After the placebo run-in period (and during the Run-In Visit  
393 described above) those who qualify will be randomized in a double-blind fashion to receive  
394 sertraline or matching placebo in a 1:1 ratio, stratified according to CKD stage (Stage 3, Stage  
395 4, or pre-dialysis Stage 5). To minimize imbalance in treatment allocation and to maximize  
396 power for analyses, blocked randomization, using a computerized random number generator,  
397 will be used to create a randomization code list for each stage strata. Block size will be  
398 determined by the study statistician and will be revealed to the research pharmacist but will not  
399 be revealed to participating investigators or research assistants. The statistician will work  
400 closely with the research pharmacist who will be responsible for preparing, storing and  
401 dispensing study drug to the research assistants. The research assistant will communicate  
402 directly with the pharmacist at the time the subjects present for randomization to receive the  
403 appropriate randomization code. The assignment sheet will be kept in the office of the research  
404 pharmacist until unblinding takes place at the completion of the study.

405 2) Key Intervention: Subjects will receive 50 mg/d of sertraline or matching placebo for the first 2  
406 weeks of intervention. They will be instructed to take the study medication once a day in the  
407 evening prior to bedtime between the hours of 8-10 pm, given that somnolence may occur with  
408 sertraline once the dose is escalated. The protocol will allow change to morning dosing in cases  
409 that the subject has trouble sleeping (45). Protocol intervention will be based on “measurement-  
410 based care” and involve the measurement of depressive symptoms and side effects at each  
411 visit (16, 73, 83). Based on clinical response and tolerability, the dosage will be increased to 2  
412 tablets (100 mg/d of sertraline or matching placebo) at week 2, to 3 tablets (150 mg/d or  
413 matching placebo) at week 4, and to a maximum dosage of 4 tablets (200 mg/d or placebo) at  
414 week 6. If intolerable side effects occur, the dosage will not be increased and will be decreased  
415 by 50 mg (1 tablet) at a time. For those specific subjects that do not tolerate the 50 mg/day  
416 dose, the dose will be decreased to 25 mg/day, but then uptitration of dose will occur per  
417 protocol every 2 weeks (50 mg to 100 mg, etc). Rationale for active drug and dosing: Sertraline

418 was chosen because it is metabolized extensively by the liver, and its active metabolite, *N*-  
419 desmethylsertraline is further metabolized to an inactive form before being renally excreted (45).  
420 In addition, the safety and efficacy of sertraline was established among patients with coronary  
421 artery disease in the SADHART trial (16). Citalopram, another commonly used SSRI that is  
422 formulary at the VA, was rejected because it is not recommended for use in patients with  
423 eGFR<20 mL/min (45). Tricyclic anti-depressants were rejected given the risk of QTc  
424 prolongation and cardiac arrhythmias (45), which would be particularly dangerous in CKD with a  
425 high burden of comorbid CV disease. Initiation of dosing for sertraline is recommended at 50  
426 mg/d as a single dose that may be increased at intervals of at least 1 week to a maximum  
427 dosage of 200 mg/d (45).

428 3) Outpatient Follow-Up Visits (5 visits, 1-2 hours each): Outpatient follow-up visits will be  
429 conducted at weeks 2, 4, 6, 9 and 12. Subjects will be asked about their general well-being and  
430 a brief physical exam including vital signs will be performed. Pill counts will be performed during  
431 each visit to assess adherence to study medication. During the visits at weeks 2, 4 and 6,  
432 subjects will be clinically evaluated for dosage escalation of drug using “measurement-based  
433 care” based on clinical response and side effect tolerability (83). This technique has been used  
434 in both the STAR\*D and SADHART trials (16, 73). The QIDS-SR-16 will be administered as the  
435 measure for clinical response. Side effect tolerability will be assessed by the self-report  
436 Systemic Assessment for Treatment Emergent Effects (SAFTEE) scale (which measures side  
437 effect type and severity) (85), and the Frequency, Intensity and Burden of Side Effects Rating  
438 (FIBSER) scale (which measures side effect frequency) (86). The QIDS-C-16 will be used as a  
439 repeated measure of outcomes and administered by an independent outcomes assessor,  
440 Susamei Khamphong, blinded to subjects’ responses on the QIDS-SR-16, the SAFTEE, the  
441 FIBSER and dose escalation regimen, during visits at weeks 2, 4, 6, 9 and 12. This will be done  
442 before the subject is clinically evaluated for dose escalation to ensure blinding for outcomes.  
443 Questionnaires for visits can be administered over the phone if on occasion a subject is unable  
444 to travel to the study site for a specific visit.

445 4) Time Window: The total duration of the double-blind phase (Period C) will be 12 weeks.

446 **d. Period D – Wash-out Phase: Withdrawal of Blinded Drug Intervention:** At the 12-week  
447 visit, tapering of study drug at the rate of 50 mg/week will commence until drug is discontinued.  
448 This will take a maximum of 4 weeks since the maximum dose of sertraline will be 200 mg.

449 1) Rationale for withdrawal of study drug: We considered continuation of sertraline at the end of  
450 the double-blind period if the subject was randomized to sertraline (vs. placebo) and was  
451 responding to treatment. However, this would not be easily accomplished as unblinding would  
452 have to occur for each subject at the end of 12 weeks to find out if the subject was receiving  
453 sertraline or placebo, and we intend to keep the trial double-blinded until all subjects complete  
454 the study and results are statistically analyzed. Slow tapering of study drug during the  
455 withdrawal phase will take place to avoid the occurrence of withdrawal syndrome reported with  
456 the abrupt discontinuation of sertraline, which can manifest as dysphoric mood, irritability,  
457 agitation, dizziness, sensory disturbances, anxiety, confusion, headache, lethargy, emotional  
458 lability, insomnia, hypomania, tinnitus, and seizures (45, 87).

459 2) Close-Out Visit (1 hour): A close-out visit will be scheduled 2 weeks after study drug has  
460 been discontinued. During this visit, the following procedures will be performed: 1) collection of

461 any remaining unused study drug; 2) discussion of plans for reporting results of the study to the  
462 subject; 3) referral of the subject to their personal physician or Mental Health as appropriate for  
463 follow-up if it is determined that there is a need for further depression treatment.

464 3) Time Window: The maximum duration of the wash-out phase (Period D) will be 6 weeks.

465 **e. DNA Study Procedures:** An optional portion of the study will investigate DNA, mRNA, and  
466 plasma biomarkers as potential moderators and mediators that are predictive of sertraline (as  
467 compared with placebo) treatment response in patients with Major Depressive Episode and  
468 CKD. This aim has the potential to produce a clinically useful algorithm to guide treatment,  
469 particularly since a large proportion of patients may discontinue SSRI treatment prematurely  
470 due to side effect, such as nausea, that is already prevalent among late-stage CKD patients.

471  
472 Blood samples will be collected at baseline, week 2, and week 12 for future DNA, mRNA and  
473 proteomics testing. At each of these time-points, two lavender top EDTA tubes (8 mL each) will  
474 be collected, one for direct DNA isolation, and the other for plasma isolation for proteomics. One  
475 2.5-mL PaxGene tube will also be collected at each time-point for direct mRNA isolation.  
476 Samples will be de-identified and stored at -80 degrees C for future testing. For plasma  
477 collection, blood tubes will be stored at 4 C (after inversion) until centrifugation, which should  
478 occur within four hours of blood collection. After centrifugation for 15 minutes at 1200 g at room  
479 temperature, the plasma layer will be carefully collected from the top of the tube with a pipette  
480 without disturbing the buffy coat. Plasma will be transferred to aliquot vials and capped, and  
481 stored upright at -80 degrees. The other two blood tubes, one EDTA and one PaxGene tube,  
482 will be also stored at -80 degrees C, until these samples are ready to be processed for DNA and  
483 mRNA analyses, respectively.

484 Genetic testing in Off-Site Location: The samples will be marked with a study unique identifier  
485 (NOT name, date of birth or SSN) and stored at University of Texas Southwestern for up to 2  
486 years until the samples are analyzed in batches. The remaining samples will be destroyed after  
487 the genetic tests are ran. The investigators may use health information for future genetic  
488 research, however any future research project will be receiving appropriate R&D committee  
489 approvals, before implementing.

490  
491

#### 492 **Clinical Measurements:**

493 **a. Demographic and Clinical Measurements:** Demographic and clinical variables will be  
494 collected from the subject and CPRS at screening. A brief physical examination will be  
495 performed during each visit where height, weight, waist and hip circumferences and blood  
496 pressure (BP) are measured. Two BP, 5 minutes apart, will be taken in the seated position after  
497 5 minutes of rest. Blood will be obtained at screening and 12 weeks by peripheral venipuncture  
498 for a complete metabolic panel, parathyroid hormone, complete blood count, prothrombin and  
499 partial thromboplastin times. Spot urine will be collected for urinalysis and urine protein-to-  
500 creatinine ratio, and 24h urine collected for creatinine, protein and urea nitrogen. A blood  
501 pregnancy test will be performed in women of childbearing age.

#### 502 **b. Depression Measures:**

503 Mini International Neuropsychiatric Interview (MINI): The MINI will be administered at the  
504 **screening visit** and used as the gold standard to determine the presence of a current MDE to  
505 determine eligibility, as well as the presence of any psychiatric exclusion criteria. It is a

506 frequently used semi-structured clinical interview for establishing psychiatric diagnoses based  
507 on DSM IV criteria, and has established reliability and validity (72). The feasibility of the use of  
508 MINI to identify a MDE was established by the PI in 272 CKD patients enrolled from the VA  
509 CKD clinic (*see Work Accomplished*). The MINI will be administered by Susamei Khamphong  
510 who was trained and certified in the laboratory of Dr. Trivedi, the senior psychiatry collaborator.  
511 Ms. Khamphong has extensive experience with this technique, as well as experience working  
512 with CKD patients, having served as the Research Assistant for Dr. Hedayati's pilot study. She  
513 will be blinded to patient medical history and scores on self-report questionnaires. Dr. Trivedi  
514 has extensive experience and expertise in interpreting the MINI in research conducted in major  
515 depression of chronic disease, as well as training personnel in administering this tool to  
516 research subjects. He headed the National Coordinating Center for the NIMH multi-site  
517 Sequenced Treatment Alternatives to Relieve Depression (STAR\*D) trial (73), which is the  
518 largest clinical trial ever conducted on treatment of depression. The MINI will take 30 to 45  
519 minutes to administer.

520 Quick Inventory of Depressive Symptomatology-Clinician Rated (QIDS-C-16) Scale: The  
521 primary outcome will be assessed using the 16-item QIDS-C-16, which assesses the DSM IV-  
522 based 9 criterion symptom domains of major depression (76, 77). This scale was used as an  
523 outcome measures in the STAR\*D trial (73), and has been validated in outpatients against the  
524 Hamilton Rating Scale for Depression (HRSD) (76). It has also been shown to be sensitive to  
525 detecting change in the severity of depressive symptoms (77). Scores range from 0 to 27, with  
526 higher scores indicating a greater severity of depressive symptoms. This scale will also be  
527 administered by Susamei Khamphong who will be blinded to subject treatment assignments and  
528 serve as the independent outcomes assessor. It will be administered before randomization (at  
529 **baseline**) and at **weeks 2, 4, 6, 9, and 12**. This scale will take 5 to 15 minutes to administer.

530 Quick Inventory of Depressive Symptomatology-Self Report (QIDS-SR-16) Scale: A patient self-  
531 administered version of the QIDS-C-16, this scale is easy and fast to administer and will be  
532 used at 3 points in the study: a) at **screening** to identify potential subjects for recruitment; b) at  
533 the at **baseline** (*end of the run-in period and before randomization*) to determine if subjects are  
534 still eligible; c) at **weeks 2, 4, and 6** to determine clinical response for study drug dose  
535 escalation. The QIDS-SR-16 was validated against the gold-standard MINI by the PI in her pilot  
536 study of predialysis CKD subjects (*see Work Accomplished*). This scale will also take 5 to 15  
537 minutes to complete and will be administered by the research coordinators.

### 538 **c. Safety and Tolerability Measures:**

539 Systemic Assessment for Treatment Emergent Effects (SAFTEE) scale: A self-administered  
540 questionnaire, it lists 55 different types of side effects, the severity of which can be rated by the  
541 subject as none, mild, moderate or severe (85). The SAFTEE was used to assess the types and  
542 severity of side effects in the STAR\*D trial (73). This scale also allows the subjects to rate the  
543 burden of side effects as none, mildly, moderately, or markedly in answer to the last item of the  
544 questionnaire "how much have all these side effects bothered you/interfered with your daily  
545 activities." It will take 5 to 10 minutes to administer and will be given at **weeks 2, 4, 6, 9, and 12**.

546 Frequency, Intensity and Burden of Side Effects Rating (FIBSER) scale: A self-administered  
547 questionnaire to assess the frequency of side effects on a Likert scale as being present 10%,  
548 25% 50% 75%, 90% or all the time (86). It also assesses the intensity of medication side effects

549 and the degree to which these side effects have interfered with day to day functions. This  
550 questionnaire was also used in the STAR\*D trial (73) to assess the frequency, intensity and  
551 burden of side effects. It takes 2 to 5 minutes and will be given at **weeks 2, 4, 6, 9, and 12.**

552 Serious adverse events: Serious adverse events (SAE) will be collected at **weeks 2, 4, 6, 9, 12**  
553 **and 16** and considered the primary outcome for safety. Data on hospitalizations (including date,  
554 reason for hospitalization, and length of stay), initiation of renal replacement therapy (including  
555 date and modality – hemodialysis, peritoneal dialysis or kidney transplantation) and death will  
556 be collected at each visit and confirmed with the subject. These 3 outcomes will also be  
557 collected at **6 and 12 months** after randomization for power calculations to determine the  
558 feasibility of conducting a future large-scale trial designed to investigate whether the treatment  
559 of depression improves outcomes in CKD. If the subject is hospitalized at the Dallas VAMC,  
560 data will be extracted from CPRS. If the subject is hospitalized elsewhere, a copy of the  
561 discharge summary will be requested from the institution where the hospitalization occurred  
562 after obtaining a signed release of information from the study subject. Date and cause of death  
563 will be confirmed by obtaining a copy of the death certificate.

564 Platelet aggregation measure: Whole blood will be collected **at baseline** (end of run-in and  
565 before randomization) and at **week 12 or exit** for whole blood aggregation test by ex vivo whole  
566 blood impedance platelet aggregometry via a Chrono-log aggregometer, platelet factor 4 and  
567 beta-thromboglobulin. This instrument uses electrical impedance in whole blood with  
568 simultaneously measuring ATP release by the luminescence method (159). The panel will  
569 include thrombin, collagen, ADP, arachidonic acid, and ristocetin. Blood will be tested at  
570 Parkland Hospital/University of Texas Southwestern Medical Center, the reference laboratory  
571 for this send-out lab at the Dallas VAMC. Use of any anti-platelet agents will be tracked at every  
572 visit on all participants, to be included in the analyses of safety as relates to platelet aggregation  
573 and bleeding.

574 Sertraline and N-desmethysertraline levels: Plasma sertraline and N-desmethysertraline levels  
575 will be quantified at week 12 or exit by using high-performance liquid chromatography with  
576 fluorescence detection in the reference Mayo Medical Laboratories, Rochester, MN.

577 **d. Overall Function and Quality of Life Measures** (obtained at **baseline, weeks 6 and 12**):

578 Work and Social Adjustment Scale (WSAS): Overall function will be assessed by the WSAS, a  
579 5-item self-report scale, assessing the subject's view of ability to work, to manage affairs at  
580 home and socially, and to form and maintain close relationships (149-150). Each question is  
581 rated on a 0 to 8 Likert scale (0 indicating no impairment; 8 indicating severe impairment) with  
582 the score ranging from 0-40. A WSAS score above 20 suggests at least moderately severe  
583 functional impairment. The WSAS take about 5 to 10 minutes to administer.

584 Kidney Disease QOL Survey (KDQOL-SF 1.3): This measure was developed by the Kidney  
585 Disease QOL Working Group as a kidney disease-specific measure of health-related QOL. It  
586 contains 80 items with 8 generic subscales derived from the Medical Outcomes Study SF-36 as  
587 well as 12 kidney disease-specific subscales. It takes 15 minutes to administer.

588 **e. Nutritional Status Measures:** Nutritional measures will be obtained at **baseline and week**  
589 **12 or study exit.** Percent of standard body weight (%SBW) will be calculated as the weight  
590 expressed as a percentage of normal body weight for healthy Americans of similar sex, height,  
591 age range and skeletal frame size using National Health and Nutrition Evaluation Survey II data

592 as the reference source (89, 98). Serum prealbumin, albumin and 24h urine for protein and urea  
593 nitrogen will be tested in the Dallas VAMC laboratory. Normalized protein nitrogen appearance  
594 (nPNA) will be calculated from the 24h urine values using the formula recommended by the  
595 National Kidney Foundation guidelines.

596 **f. Medication self-reported adherence:** The Morisky Self-Reported Medication-Taking Scale  
597 (176) will be used as the measure of medication adherence and will be administered at **weeks**  
598 **2, 4, 6, 9 and 12**. It uses a Likert scale ranging from “strongly agree” to “strongly disagree” for 5  
599 items regarding medication-taking behavior and takes 1 to 5 minutes to complete.

600 **g. Cognitive Function Measure:** Alternate forms will be used on all tasks when available to  
601 control for practice effects. The selected tasks are widely accepted and validated  
602 neuropsychological tests and will be administered at **baseline and week 12 or exit**.

603 Continuous Performance Test (CPT) (Beck et al 1956): The CPT is a measure of sustained  
604 attention during which participants must focus on a continual presentation of stimuli and  
605 respond to a target stimulus. Scoring is most frequently based on response time, omission  
606 errors (nonresponse to target stimulus), and commission errors (false response to target  
607 stimulus) that are then reduced to a single composite discrimination score d'. We are using the  
608 CPT-IP version that is available in the MCCB.

609 Trail Making Test (parts A [TMT-A] and B [TMT-B]) (Reitan 1955; Reitan 1992):The Trail Making  
610 Test consists of two parts: part A, which measures psychomotor speed and attention, and part  
611 B, which measures both speed and sequencing. The tests involve visual scanning skills and  
612 set-shifting ability and assess cognitive flexibility. In the task, participants are presented with  
613 numbered circles and asked to connect the numbers (part A). In part B, lettered circles are  
614 presented along with the numbers and the subject must connect a series of alternating numbers  
615 and letters. Scoring is based on timed correct performance.

616 Stroop Color and Word Test (Golden 1978; Stroop 1935): The Stroop Color and Word Test is a  
617 measure of attention response inhibition. The test consists of three subscales: 1) word – color  
618 nouns (e.g., red, blue) printed in black ink are presented and participants must read the word; 2)  
619 color – the letter “x” is presented in colored ink and participants are asked to name the color;  
620 and 3) color-word – color nouns are presented in discrepantly colored ink and participants are  
621 asked to name the color. An Interference score is also calculated to represent a composite of  
622 the subscales.

623 Controlled Oral Word Association Test (COWAT) (Benton et al 1983): The COWAT is a test of  
624 verbal fluency that requires participants to generate as many words as possible in three 60  
625 second time periods. Participants are instructed to generate words in a given trial that begin with  
626 a particular letter (F, A, S; P, R, W; or C, F, or L) and proper nouns or words with multiple  
627 endings are not allowed. Performance is measured by summing the number of acceptable  
628 words across all three trials, as well as by the number of errors made.

629 Rey Auditory Verbal Learning Test (RAVLT) (Lezak 1983; Schmidt 1996.): The RAVLT  
630 measures short-term verbal learning and memory, as well as recognition and post-interference  
631 recall. The test consists of an auditory presentation of a list of 15 nouns that are read five times,  
632 with free recall assessed after each presentation. An interference list is then read to participants  
633 followed by recall of the novel list, and another recall evaluation of the original list (i.e., post-

634 interference recall). Participants are then presented a story containing all of the words from the  
635 original list and are asked to identify those words from the story.

636 **h. Markers of Inflammation:** C-reactive protein measurements will be performed using a  
637 commercially available high-sensitivity assay (Roche diagnostics, Indianapolis, Indiana) (163).  
638 Interleukin 6 (IL-6) will be measured by Chemiluminescent Immunoassay as a send-out lab from  
639 the Dallas VAMC Specialty Laboratories, Inc., Santa Monica, CA. These labs will be performed  
640 at **baseline and week 12 or exit**.

641 **13. Anticipated Data and Data Analysis:** All models will be checked for the validity of the  
642 assumption of normality, and non-normal data will be subjected to appropriate transformation or  
643 nonparametric methods will be used. All analyses will include the baseline value of the outcome  
644 as a covariate. In addition, baseline demographic and clinical characteristics (e.g., age, gender,  
645 length of current MDE, age on onset, etc.) will be considered for inclusion as covariates if they  
646 improve the fit of the model. The need for higher order time terms or the transformation log  
647 (time+1) to obtain a better fitting model will be considered for the repeated measures analyses.  
648 The need for interaction terms will also be considered. All analyses will use all available data  
649 from all randomized subjects and utilize "intention-to-treat" analyses. That is, subjects will be  
650 analyzed in the treatment group they were randomly assigned to, and analyses will include data  
651 on all subjects regardless of adherence to protocol, actual treatment received, or subsequent  
652 departure from assessments, treatments or protocol deviation. If the subject withdraws consent,  
653 then data collection will stop on that particular subject and their data will be included only up to  
654 the point before withdrawal of consent. Sensitivity analyses will also be performed, referred to  
655 as "modified intention-to-treat," including all data collected while the subject was receiving study  
656 medication, but excluding the data collected after the subject stops taking study drug (i.e., due  
657 to intolerable side effects).

658  
659 All tests will be two-sided with alpha of 0.05 used for significance. A one-sided test was  
660 considered as an alternative but rejected because it is possible that we will obtain the result that  
661 sertraline is worse than placebo. In that case, a two-sided test will allow for the conclusion that  
662 sertraline is significantly worse than placebo but a one-sided test will only allow for the  
663 conclusion that sertraline is not significantly better than placebo. We believe that if sertraline  
664 were worse than placebo it would be important to be able to make the statement that it was  
665 significantly worse.

666 **Aim 1: Determine if treatment with sertraline, as compared with placebo, results in an**  
667 **improvement in depression severity.**

668 **Aim 1 Primary Outcome:** *The primary outcome is the change from baseline in the QIDS-C-16*  
669 *score in the sertraline- as compared with the placebo-treated group.* QIDS-C-16 scores will be  
670 compared between treatment groups using a random regression model (also known as a mixed  
671 effects model) (SAS Proc Mixed) with a random intercept term and time (visit week 2, 4, 6, 9  
672 and 12) as the within-subjects factor and treatment group (sertraline vs. placebo) as the  
673 between-subjects factor. The model will contain terms for treatment group, visit week, and  
674 treatment group by visit week interaction. The hypothesis will be tested by the significance of  
675 the treatment group by time interaction effect or the treatment group main effect. The baseline  
676 QIDS-C-16 score will be a covariate in the model. Although every effort will be made to prevent  
677 dropouts, this analysis will allow for the inclusion of missing data. A comprehensive sensitivity



678 analyses will be performed to investigate the consequences of incomplete observations in the  
679 analysis of repeated measurement data. Sensitivity analyses will be done using local influence,  
680 pattern mixture models, and multiple imputations (90).

681 Aim 1 Secondary Outcomes: *Secondary outcomes include response to treatment (decline of*  
682 *≥50% in the baseline QIDS-C-16 score) and remission of depression (QIDS-C-16 score of ≤5).*  
683 Each subject will be classified as a responder or non-responder and remitter or non-remitter at  
684 each visit using these criteria. A generalized linear mixed model (GLMM) as implemented in the  
685 SAS Proc Glimmix program will be employed for the response outcome and the remission  
686 outcome. This model adapts the usual continuous-outcome, random regression model for use  
687 with a binary outcome. The model will contain terms for treatment group (sertraline vs. placebo)  
688 as the between-subjects factor, a random intercept, time (visit week 2, 4, 6, 9 and 12), and  
689 treatment group by time interaction as the within subjects factor, and baseline QIDS-C-16 as a  
690 covariate. The hypothesis will be tested by the significance of the treatment group by time  
691 interaction or the treatment group main effect.

692 Anticipated Findings: It is anticipated that treatment with sertraline will result in more  
693 improvement in depressive symptoms and higher response and remission rates than placebo in  
694 Stages 3-5 CKD patients with MDE. Establishing the efficacy of SSRI sertraline for treatment of  
695 MDE in patients with CKD will be ground-work for a future larger randomized multi-center trial to  
696 investigate whether treatment of depression will improve CKD morbidity and mortality.

697 **Aim 2: Determine if sertraline treatment vs. placebo improves overall function and QOL.**  
698 Aim 2 outcomes include overall function as assessed by a change in score on the WSAS and  
699 QOL as assessed by a change in score on the KDQOL-SF. These are also secondary  
700 outcomes. Each of these outcomes will be compared between groups using the random  
701 regression analysis as described for Aim 1.

702 Anticipated Findings: We anticipate that treatment of MDE with sertraline will result in more  
703 improvement in QOL than placebo in CKD subjects. Given that poor QOL is associated with  
704 mortality in CKD, future large trials can investigate whether this improvement in QOL will  
705 translate into better survival for these patients.

706 **Aim 3: Determine if treatment with sertraline, as compared with placebo, is safe and**  
707 **tolerable.** This will be assessed by: a. proportion in each group with serious adverse events; b.  
708 type, severity and frequency of side effects; c. reduction in platelet aggregation in sertraline vs.  
709 placebo group, and whether this reduction correlates with higher plasma sertraline levels. This  
710 will be an exploratory outcome.

711 Aim 3a: The proportion of subjects experiencing a SAE will be the primary safety outcome  
712 measure and compared between groups using logistic regression with presence/absence of an  
713 SAE as the dependent variable and treatment group along with any other necessary covariates  
714 (such as age, eGFR, comorbidities, and depression severity) as the independent variables.

715 Aim 3b: The outcome measure for *type and severity* of side effects will be assessed by the  
716 SAFTEE scale. The proportion of subjects with each type of side effect reported on the SAFTEE

717 will be compared between treatment groups using the Chi-square test. The maximum SAFTEE  
718 global assessment of side effects (first item, 0-4 scale) will be analyzed using an ordinal logistic  
719 regression model with maximum SAFTEE global assessment as the dependent variable and  
720 treatment group along with any other necessary covariates are the independent variables.

721 The outcome measure for *frequency of side effects* will be the proportion in each group with  
722 side effects reported on the FIBSER scale. For the first item of the FIBSER, a binary outcome  
723 will be created with 0 indicating no side effects and 1 indicating side effects present at least  
724 some of the time. The binary outcome (side effect presence/absence) will be defined for each  
725 subject for each visit and analyzed using a GLMM as described for Aim 1, secondary outcomes.  
726 Two additional analyses will be done on the intensity and burden of side effects (items 2 and 3  
727 of the FIBSER, respectively) using only those subjects who experience side effects at some  
728 point during the study. The 0 to 6 point scores on items 2 and 3 will be analyzed as continuous  
729 outcomes using random regression models as described for Aim 1.

730 Aim 3c: Paired t-test will be used to test whether platelet aggregability at week 12 or at exit is  
731 reduced from baseline. Student's t-test will be used to test whether the change in platelet  
732 aggregability from baseline is different in the sertraline-treated as compared with the placebo-  
733 treated group. The association of platelet aggregability and sertraline/*N*-desmethylsertraline  
734 levels with bleeding episodes requiring blood transfusion or hospitalization will be assessed  
735 using both univariate and multivariate logistic regression in separate models, with the presence  
736 of such bleeding episodes as the dependent variable and platelet aggregation or sertraline/*N*-  
737 desmethylsertraline levels as the main independent variables. Independent covariates included  
738 in the multivariable logistic model will consist of hemoglobin, platelet count, eGFR, and  
739 concomitant therapy with an anti-platelet agent. Linear regression will be used to identify if there  
740 is a negative correlation between aggregability and plasma sertraline and *N*-desmethylsertraline.

741 Anticipated Findings: We anticipate that subjects receiving sertraline will have higher rates of  
742 minor side effects on SAFTEE and FIBSER but not have higher rates of SAEs than those  
743 receiving placebo. We also anticipate that there will be a greater reduction in platelet  
744 aggregation in the sertraline-treated as compared with the placebo-treated group, but this  
745 reduction will not be associated with increased adverse events such as bleeding episodes  
746 requiring blood transfusion or hospitalization. We also anticipate that sertraline and *N*-  
747 desmethylsertraline levels will inversely correlate with platelet aggregability.

748 **Aim 4: Investigate mechanisms by which sertraline may affect outcomes.** We will  
749 determine if sertraline treatment vs. placebo will improve: a. nutritional status; b. adherence to  
750 prescribed medications; c. cognitive functioning; and d. markers of inflammation. These will be  
751 exploratory outcomes.

752 Aim 4a: The percent of standard body weight (%SBW) will be calculated as the weight  
753 expressed as a percentage of normal body weight for healthy Americans of similar sex, height,  
754 age range and skeletal frame size using National Health and Nutrition Evaluation Survey II data  
755 as the reference source (89, 98). Paired t-test will be used for normally distributed variables and  
756 Wilcoxon signed rank sum for variables non-normally distributed to test whether %SBW, nPNA,  
757 prealbumin and albumin at week 12 or exit are reduced in subjects from baseline. Student's t-

758 test or Wilcoxon rank sum will be used to test whether the changes from baseline are different in  
759 the sertraline vs. placebo groups. Linear regression models (or non-parametric regression if the  
760 variable not normally distributed) will be constructed with %SBW, nPNA, prealbumin or albumin  
761 as the dependent variables and treatment group as the main independent variable. Independent  
762 covariates will include age, eGFR, presence of edema, and albuminuria.

763 Aim 4b: The Morisky Self-Reported Medication-Taking Scale (176) will be used as the measure  
764 of medication adherence. The Likert point scores on items 1 thru 5 will be analyzed as  
765 continuous outcomes using random regression models as described for Aim 1.

766 Aim 4c:

767 1) *Participants treated with sertraline will have significantly greater improvements in cognitive*  
768 *functioning versus those receiving placebo.* The *primary outcome* measure will be the  
769 composite score derived from the Trail Making Test parts A and B, Continuous Performance  
770 Test, Stroop, Controlled Oral Word Association Test, and Rey Auditory Verbal Learning Test.  
771 The composite measure at week 12 will each be compared between groups using analysis of  
772 covariance (ANCOVA) with the baseline value of the composite as a covariate in the model. If a  
773 participant is missing more than two cognitive tests, their data will not be used. If one cognitive  
774 test is missing at a visit then the missing test will be imputed using multiple imputation  
775 techniques. Please note that missing data (particularly in the form of missing one of the tests in  
776 the battery) are highly unlikely, and every effort will be made to perform all tests at all visits.

777 2) *Participants treated with sertraline will have significantly greater improvements in each*  
778 *cognitive functioning domain (attention, executive function, and verbal learning and memory)*  
779 *versus those receiving placebo.* The cognitive tests that measure attention (Trails A and  
780 Continuous Performance Test) will be analyzed together using multivariate analysis of  
781 covariance (MANCOVA) at week 12. The treatment group main effect will be tested and  
782 baseline values will be included as covariates. The tests that measure executive function (Trails  
783 B, Stroop, and COWAT) will be similarly analyzed by MANCOVA. The between groups  
784 comparison of the Rey Auditory Verbal Learning Test at 12 will be made using ANCOVA with  
785 the baseline value as a covariate.

786 The family-wise correction will be used to address concerns of multiple comparisons since 3  
787 tests are to be conducted (Ilsley et al 1995). If a subject is missing an entire cognitive domain  
788 battery at a visit (e.g., the attention battery at week 12) then the subject cannot be used in the  
789 analysis of that cognitive battery, but if the subject has data for other cognitive batteries at that  
790 visit (e.g., executive function at week 12), then those data would be used. If a subject is missing  
791 one component of a cognitive battery (for example, the subject has Trails A data but is missing  
792 the Continuous Performance Test at week 12), then the missing test will be imputed using  
793 multiple imputation techniques and the cognitive battery used in the analysis.

794 Aim 4d: *Sertraline treatment vs. placebo will decrease levels of markers of inflammation, C-*  
795 *reactive protein (CRP) and IL-6, from baseline.* Wilcoxon signed rank sum for paired groups and  
796 nonparametric regression will be used for comparisons, given that CRP and IL-6 are not  
797 normally distributed.

798

799 Anticipated Findings: We anticipate that subjects treated with sertraline will have more  
800 improvement from baseline in measures of nutritional status, adherence to prescribed  
801 medications, cognitive function and inflammation than those treated with placebo.  
802

803 **Aim 5: Collect data on death, hospitalizations, and dialysis initiation at 6 and 12 months**  
804 **after randomization for power calculations to determine** the feasibility of conducting a large-  
805 scale trial designed to investigate whether the treatment of depression improves outcomes in  
806 CKD. This aim is exploratory and there may not be enough events to show a statistically  
807 significant difference in outcomes between the sertraline-treated and placebo-treated groups.  
808 Nevertheless, the following statistical analysis is anticipated.  
809

810 Percent of patients with composite events (death, hospitalization or dialysis initiation) at 6 and  
811 12 months will be compared between groups (sertraline vs. placebo) using Chi-square test.  
812 Mean survival time will be compared among groups using Log-rank statistic. Kaplan Meyer  
813 survival curves and Cox Proportional Hazards models will be used to evaluate the independent  
814 association of treatment with sertraline with the primary composite outcome. Secondary  
815 outcomes will be each of these 3 events assessed separately. Multivariable models will be  
816 adjusted for clinically relevant covariates such as age, gender, race, comorbidities, eGFR, etc.  
817

818 Anticipate Findings: It is anticipated that there will be enough preliminary data to conduct  
819 sample size calculations for a large multi-center trial, such as a VA Cooperative study, aimed to  
820 investigate whether treatment of major depressive episode with sertraline vs. placebo will  
821 improve outcomes in patients with moderate to advanced chronic kidney disease.  

---

822

823 **14. Provisions for Managing Adverse Events:** Adverse Events (AEs) and Serious Adverse  
824 Events (SAEs) will be defined per the *VHA Handbook 1058.01, 2/27/09*, and VA/ICH/FDA  
825 regulation-compliant version:

826 **Adverse Event (AE)** is defined as any unfavorable and unintended change in the structure  
827 (signs), function (symptoms), or chemistry (laboratory data) of the body temporally associated  
828 with any use of a clinical trial intervention. An AE does not have necessarily have to have a  
829 causal relationship with the treatment.

830 **Serious Adverse Event (SAE)** is any medical occurrence that:

- 831 1) Results in death
- 832 2) Is life threatening
- 833 3) Requires inpatient hospitalization or prolongs existing hospitalization
- 834 4) Results in a significant, persistent or permanent disability or incapacity
- 835 5) Is a congenital anomaly
- 836 6) Requires intervention (medical or surgical) to prevent permanent impairment or damage
- 837 7)

838 **Unanticipated Problem (UP)** are events involving any aspect of the research study and  
839 anyone including participants, research staff, or others not directly involved in the research.  
840 They are always *unanticipated* by definition.

841 Given the comorbidity associated with CKD and MDE, it is expected that a large number of AEs  
842 will be observed, most of which will not be related to the study intervention. For this reason, only  
843 SAEs will be reported, and AEs will be reported as listed below in **Stopping Points**. Realistic

844 SAEs for CKD patients include 1) *death*, 2) *hospitalization* and 3) *dialysis initiation*. Realistic  
845 SAEs for patients with MDE also include *suicide*. The VA CSR&D Centralized Data Monitoring  
846 Committee (DMC) will provide study oversight to ensure the safety of subjects (see below). The  
847 PI will report any SAEs to the Dallas VA IRB and the DMC not more than 2 working days after  
848 the time the PI or study staff become aware of the event, and UPs will be reported not more  
849 than 5 working days after becoming aware of the problem.

## 850 **SAEs Unique to This Study**

851 All study team members will complete the “Suicide Prevention” training modules on the VA  
852 website: VA employees will use the LMS system and WOCs will use the EES system. In  
853 addition, all study team members will be trained prior to study initiation in the identification and  
854 assessment of suicidal risk based on both participant responses to study instruments as well as  
855 in-depth questioning of participants about their current suicidality. Training will include case  
856 scenarios, and will be administered by a trained specialist in Dr. Trivedi’s group.

857  
858 An additional objective scale to measure suicidal ideation will be administered to subjects at  
859 each visit that formally assesses suicide risk. This questionnaire, the “Concise Health Tracking  
860 – Self-Rated Scale” or CHRT, has been previously used by Dr. Trivedi’s group in other studies  
861 of depression and is attached. Any subject that states "neither agree nor disagree", "agree", or  
862 "strongly agree" to items 5, 6, or 7 will be identified at that visit and further queried.

863  
864 If a subject is discovered to have ***acute suicidal intent*** (that is, has a stated plan or needs  
865 inpatient care), the following *referral actions* will be followed:

866 a) If the patient is thought to be an immediate threat to themselves or others, they will be  
867 escorted to the Emergency Department for further evaluation by the Mental Health consult team  
868 and possible admission.

869 b) If the patient is not thought to be an immediate threat to themselves or others, they will be  
870 escorted to the Mental Health Clinic for triage.

871 c) In addition, the Research Pharmacist will unblind the subject to the Mental Clinic MD, who will  
872 decide what drug treatment to offer the patient after assessment. The Mental Health MD will be  
873 advised to slowly titrate down the dose if the patient was on sertraline (in order to avoid  
874 withdrawal symptoms) and if the MD decides to discontinue this medication.

875  
876 **2) *Bleeding requiring hospitalization:*** Bleeding has been reported with SSRI use and CKD  
877 patients may be at increased risk of bleeding due to platelet dysfunction secondary to uremia.

878  
879 **Stopping Points:**

880  
881 ***Withdrawal from drug:*** Study drug will be terminated if the subject encounters the following.  
882 However, unless the subject chooses to withdraw consent, study assessments will continue as  
883 per protocol.

884 1) Any *adverse event* attributed to blinded study drug that in the opinion of the PI would  
885 obviate the reinstatement of drug, such as bleeding requiring hospitalization.

886 2) Intolerable side effects despite a decrease in the dose of study drug to a minimum of 50  
887 mg per day and subject decides to stop study drug.

- 888 3) Worsening of depressive symptoms that in the opinion of the PI would obviate  
889 continuation of study drug or presence of acute suicidal intent as defined above.  
890 4) Pregnancy.  
891 5) Recommendation by the DMC.  
892

893 **Withdrawal from study:** The subject will be withdrawn from the study if the subject decides to  
894 withdraw informed consent. All the assessments and data collected to that point will be used but  
895 no additional data will be collected.  
896

897  
898 The PI will document that a stopping point has occurred and notify the subject to discontinue  
899 and return study drug. The subject will be scheduled for a close-out visit to arrange follow-up  
900 with their personal physician or Mental Health as indicated. A stopping point will be reported to  
901 the DMC and the IRB not more than 5 working days after becoming aware of the problem. If the  
902 stopping point is an SAE, it will be reported not more than 2 working days.

903 **15. Risk/Benefit Assessment:** The overall risk classification for the research is greater than  
904 minimal. Minimal potential risks to subjects include 1) breach of confidentiality; 2) physical risks  
905 such as discomfort, bleeding, or bruising from venipuncture; and 3) side effects of sertraline.  
906 Common side effects of sertraline (affecting >10% of individuals) may be temporary and include  
907 nausea, decrease in appetite, diarrhea, dry mouth, dizziness, headache, insomnia, somnolence,  
908 decreased libido, sweating and tremors. Less common side effects of sertraline (1-10%) include  
909 chest pain, palpitations, agitation, nervousness, pain, rash, impotence, increased appetite,  
910 constipation, vomiting, weakness, visual problems, yawning, and tinnitus. Rare (<1%) but  
911 greater than minimal potential risks such as bleeding, extrapyramidal reactions, neuroleptic  
912 malignant syndrome and suicide have been much less commonly reported with sertraline use  
913 (45-47). Abnormal bleeding, serious allergic reactions, liver damage, kidney damage, psychosis,  
914 worsening depression, arrhythmias, and SIADH have been reported. Withdrawal symptoms  
915 such as agitation, anxiety, confusion, headache and seizures could occur if sertraline is stopped  
916 abruptly.

917 To minimize potential risks, subjects will be seen frequently (every 2-3 weeks) to monitor for any  
918 study drug side effects or adverse events. The SAE monitoring period will be from initiation of  
919 study drug to at least 30 days beyond the end of treatment. The PI will continually reassess  
920 risks vs. benefits to subjects throughout the study period and at any time an unexpected or  
921 serious adverse event occurs. The PI will report any SAEs to DMC and IRB (see below for  
922 DMC). Please see section 20 for provisions for *subject confidentiality*.

923 This study could have potential benefits for both study subjects and others; therefore, the risks  
924 to subjects are reasonable in relation to the anticipated benefits to research subjects and others.  
925 The benefits include the knowledge that may be gained. If the results of this study are positive, it  
926 could lead to improved outcomes (improvement in depression and quality of life) of study  
927 subjects with CKD and MDE and non-study patients with similar diseases.  
928

929 **16. Data Safety and Monitoring Plan:** *The VA CSR&D Centralized Data Monitoring Committee*  
930 *(DMC) at Hines* will provide independent study oversight to ensure the safety of subjects and

931 the validity and integrity of the data. The DMC will perform an initial review of the protocol with  
932 regards to recruitment/retention strategies, safety plan, monitoring of adverse events, and  
933 analysis plans. Routine progress reports will be provided by the PI to the DMC as requested  
934 annually and non-routine data reports will be provided as needed and include data on serious  
935 adverse events and stop points. The CSR&D DMC will review the study data every 6 months for  
936 adverse event occurrence, safety monitoring, overall performance and data generation and  
937 assess risk-to-benefit ratio. The DMC will generate non-routine reports to the PI and IRB in the  
938 event of any unexpected findings that would jeopardize subject safety.

939 **17. Process for Obtaining Informed Consent and Protecting Patient Privacy:** Written  
940 informed consent will be witnessed and obtained prior to enrollment by the study coordinator  
941 and the PI in accordance with OHRP guidelines and the Dallas VA IRB. Consent will be  
942 obtained in CKD clinic or CRU private rooms for protection of patient privacy. Potential subjects  
943 will be provided with information detailing the purpose of the study, procedures involved, that  
944 participation is voluntary, risks and possible benefits, alternatives to participation and the option  
945 to withdraw. Questions by subjects will be encouraged and answered.

946 **18. Documentation of Informed Consent:** The individuals obtaining consent will enter the  
947 appropriate research enrollment accept or decline note into the CPRS. A copy of the signed  
948 consent form will be given to the subject, a copy retained for the research files and another copy  
949 scanned into CPRS. The research enrollment note placed in CPRS will follow the structure in  
950 Chapter 8 of the PPHRS. Patients with reduced decision-making capacity requiring a legal  
951 authorized representative will not be included in the study.

952 **19. Payment to Subjects for Their Participation:** Many of patients travel over 50 miles to  
953 come to the Dallas VA and will need to do so for 8 outpatient visits during the course of the  
954 study. We plan to reimburse patients \$50.00 each for visit 1 and for visit 6 (week 12), which are  
955 study visits with blood draws, and \$25.00 for each of the other 6 study visits to cover travel and  
956 parking expenses. An additional \$50.00 will be given to subjects who agree to the optional  
957 genetic testing part of the study.

958  
959 **20. Provisions for Data Storage and Confidentiality:** All efforts will be utilized to ensure  
960 subject confidentiality and all data will be held confidentially. HIPAA regulations will be  
961 discussed with all subjects and HIPAA consent will be obtained with the study consent. Subjects  
962 will be identified using unique identifiers and will not be referred to by name or social security  
963 number on research documents. All paper records will be maintained in a locked cabinet in the  
964 research team's locked office. Computerized data will be de-identified, stored separately from  
965 the key code, and stored on the VA-secured network that is accessible from a password  
966 protected computer in a locked office of the research team. In accordance with VA guidelines,  
967 all records of this research study will continue to be securely maintained for a minimum of six  
968 years from the date of completion of the study. The records will be kept in a locked file cabinet  
969 or locked room with limited access or stored at a VA-approved storage facility. If the PI leaves  
970 the VA facility, the research records will be retained by the institution. Only members of the  
971 research team, VA DMC and the Dallas VA IRB will have access to subject individually  
972 identifiable private information. A de-identified limited dataset will be transported and stored

973 offsite at UT Southwestern Medical Center North Campus located at 6363 Forest Park Road for  
974 statistical analysis by biostatistician Dr. Thomas Carmody, after permission to transport and  
975 store data offsite has been approved by the Dallas VAMC.

976

977 **21. Provisions for Storage/Analysis of Research Specimens: N/A**

978

979 **22. Dissemination of Research Results:** We expect to generate data regarding the safety and  
980 efficacy of sertraline used for treatment of major depressive episode in patients with CKD. We  
981 will also generate estimates of treatment effect size for power analysis for a future multicenter  
982 trial in this population of patients. The proposed mechanism for data sharing will be via  
983 publication in discipline specific journals and through presentation of the preliminary findings at  
984 annual national and specialty meetings for kidney disease. We will adhere to the NIH policies on  
985 sharing of research resources, as outlined in “Principles and Guidelines for Recipients of NIH  
986 Research Grants and Contracts on Obtaining and Disseminating Biomedical Research  
987 Resources” (NIH Office of Technology Transfer, December 1999).

988

989 **23. Multi-Center Research: N/A**

990
