# Supplementary material
Source: PubMed Central journal article supplement (PMC5710375)
Supplement: jama-318-1876-s003.pdf [file jama-318-1876-s003.pdf]

## Supplementary Online Content

Hedayati SS, Gregg LP, Carmody T, et al. Effect of sertraline on depressive symptoms in patients with chronic kidney disease without dialysis dependence: the CAST randomized clinical trial. *JAMA*. doi:10.1001/jama.2017.17131

**eFigure.** Randomized double-blinded placebo-controlled trial of sertraline treatment of depression in patients with chronic kidney disease

**eTable.** Treatment efficacy endpoints at exit

This supplementary material has been provided by the authors to give readers additional information about their work.

**eFigure.** Randomized double-blinded placebo-controlled trial of sertraline treatment of depression in patients with chronic kidney disease

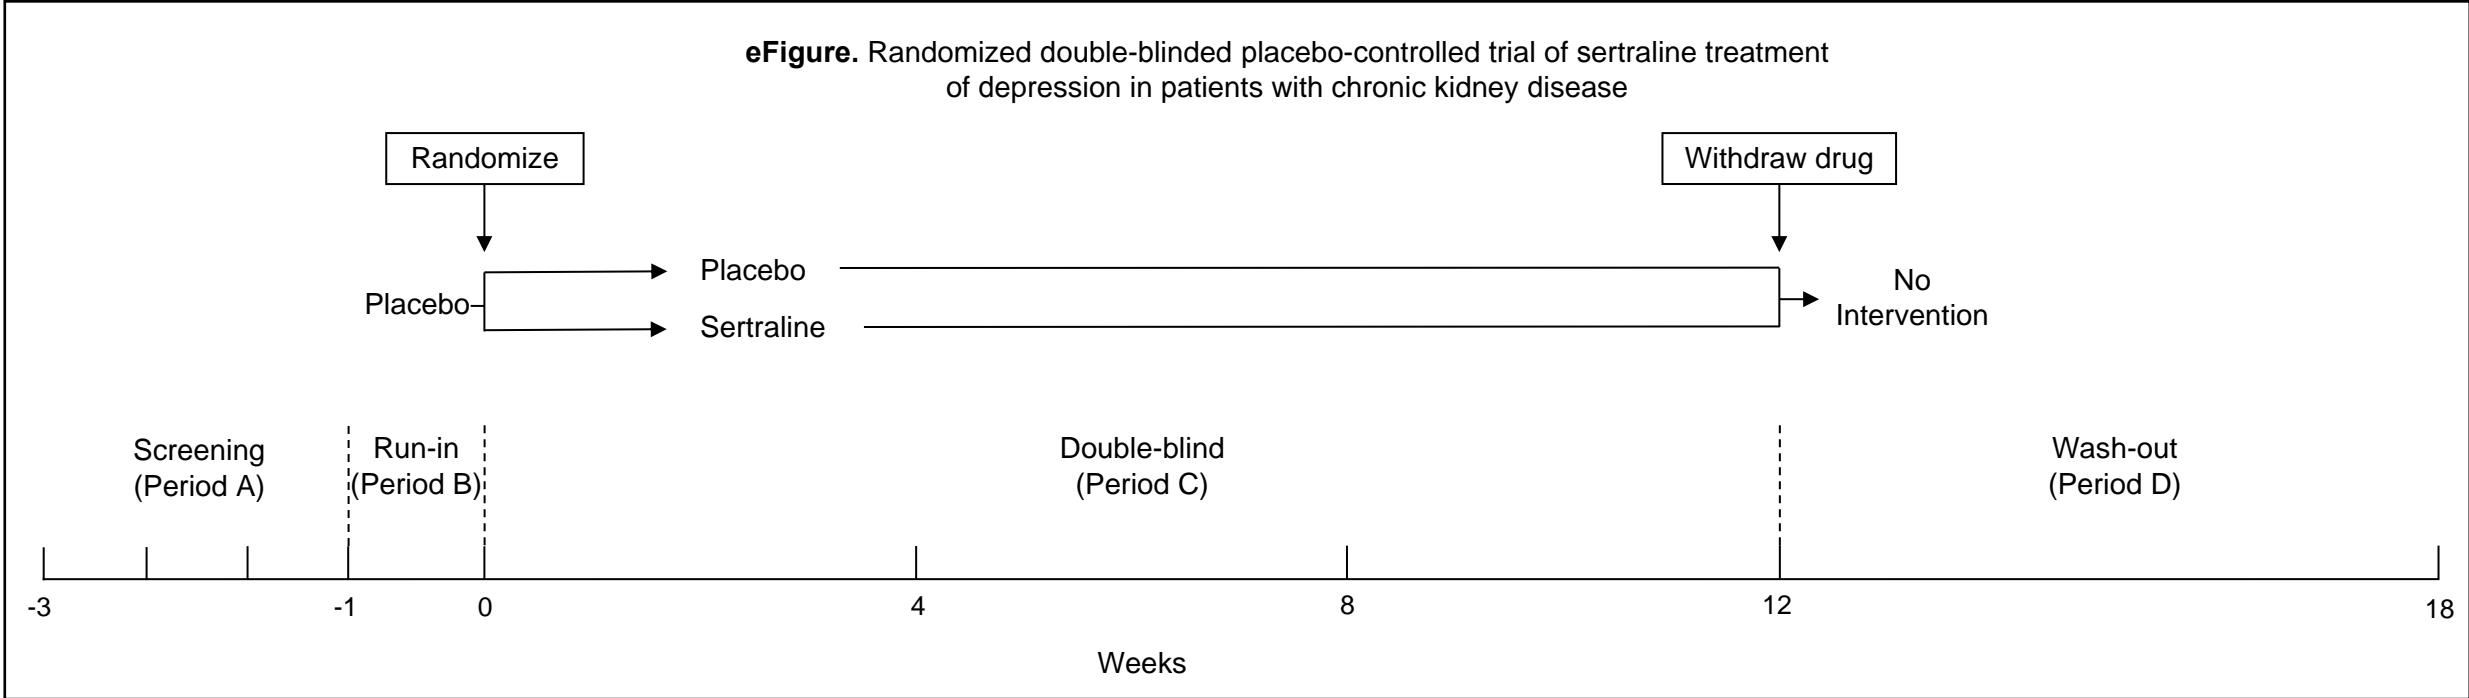

**eTable.** Treatment efficacy endpoints at exit

| Endpoint                                                    | Sertraline<br>(N = 97) | Placebo<br>(N = 96) | Difference<br>(95% CI) | P value |
|-------------------------------------------------------------|------------------------|---------------------|------------------------|---------|
| <b>Primary Endpoint</b>                                     |                        |                     |                        |         |
| QIDS-C <sub>16</sub> exit score, mean (95% CI) <sup>a</sup> |                        |                     |                        |         |
| Total cohort                                                | 9.9 (9.0, 10.7)        | 9.8 (9.0, 10.6)     | 0.0 (-1.1, 1.2)        | 0.96    |
| <b>Secondary Endpoints</b>                                  |                        |                     |                        |         |
| QIDS-C <sub>16</sub> exit score, mean (95% CI) <sup>a</sup> |                        |                     |                        |         |
| CKD Stage 3 <sup>b</sup>                                    | 9.6 (8.2, 11.1)        | 9.3 (8.0, 10.6)     | 0.3 (-1.6, 2.2)        | 0.78    |
| CKD Stage 4 <sup>b</sup>                                    | 9.7 (8.4, 11.0)        | 10.1 (9.0, 11.3)    | -0.4 (-2.1, 1.3)       | 0.64    |
| CKD Stage 5 <sup>b</sup>                                    | 10.8 (8.8, 12.9)       | 10.5 (8.2, 12.8)    | 0.3 (-2.6, 3.3)        | 0.82    |
| University and Parkland Site                                | 10.3 (9.3, 11.4)       | 11.0 (9.7, 12.2)    | -0.6 (-2.2, 1.0)       | 0.44    |
| VA Site                                                     | 9.4 (8.0, 10.8)        | 8.7 (7.7, 9.7)      | 0.7 (-1.0, 2.4)        | 0.41    |
| WSAS exit score, mean (95% CI) <sup>c</sup>                 | 14.2 (11.6, 16.8)      | 15.4 (12.5, 18.2)   | -1.2 (-5.0, 2.7)       | 0.55    |
| KDQOL-SF 1.3 exit score, median (IQR) <sup>d</sup>          |                        |                     |                        |         |
| Kidney disease component                                    |                        |                     |                        |         |
| Symptoms and Problems                                       | 77.2 (64.6, 87.5)      | 77.3 (63.6, 88.6)   | 0.0 (-4.5, 4.5)        | 0.96    |
| Effects of Kidney Disease                                   | 75.0 (56.3, 87.5)      | 68.8 (53.1, 87.5)   | 3.1 (-5.4, 9.4)        | 0.58    |
| Burden of Kidney Disease                                    | 50.0 (31.3, 81.3)      | 50.0 (31.3, 68.8)   | 6.2 (0.0, 18.8)        | 0.16    |
| Work Status                                                 | 0.0 (0.0, 50.0)        | 0.0 (0.0, 50.0)     | 0.0 (0.0, 0.0)         | 0.25    |
| Cognitive Function                                          | 76.7 (53.3, 100.0)     | 80.0 (60.0, 100.0)  | 0.0 (-6.7, 6.7)        | 0.83    |
| Quality of Social Interaction                               | 73.3 (60.0, 86.7)      | 66.7 (53.3, 86.7)   | 0.0 (0.0, 6.7)         | 0.28    |
| Sexual Function                                             | 50.0 (25.0, 100.0)     | 62.5 (37.5, 100.0)  | 0.0 (-25.0, 12.5)      | 0.78    |
| Sleep                                                       | 71.3 (55.0, 80.0)      | 58.8 (47.5, 70.0)   | 7.5 (2.5, 12.5)        | 0.02    |
| Social Support                                              | 83.3 (50.0, 100.0)     | 66.7 (33.3, 83.3)   | 16.7 (0.0, 16.7)       | 0.01    |
| Patient Satisfaction                                        | 83.3 (66.7, 83.3)      | 83.3 (50.0, 83.3)   | 0.0 (0.0, 0.0)         | 0.89    |
| Physical functioning component                              |                        |                     |                        |         |
| Physical Functioning                                        | 40.0 (20.0, 65.0)      | 35.0 (15.0, 55.0)   | 5.0 (-5.0, 14.3)       | 0.27    |
| Role Limits – Physical                                      | 25.0 (0.0, 75.0)       | 0.0 (0.0, 50.0)     | 0.0 (0.0, 0.0)         | 0.11    |
| Pain                                                        | 55.0 (32.5, 77.5)      | 55.0 (22.5, 67.5)   | 0.0 (-10.0, 10.0)      | 0.63    |
| General Health                                              | 40.0 (20.0, 50.0)      | 30.0 (20.0, 45.0)   | 5.0 (-5.0, 10.0)       | 0.26    |
| Mental functioning component                                |                        |                     |                        |         |
| Emotional Well-being                                        | 72.0 (56.0, 80.0)      | 68.0 (52.0, 84.0)   | 0.0 (-8.0, 4.0)        | 0.93    |
| Role Limits - Emotional                                     | 66.7 (0.0, 100.0)      | 33.3 (0.0, 100.0)   | 0.0 (0.0, 0.0)         | 0.33    |

|                          |                   |                   |                  |      |
|--------------------------|-------------------|-------------------|------------------|------|
| Social Function          | 62.5 (37.5, 87.5) | 50.0 (37.5, 87.5) | 0.0 (0.0, 12.5)  | 0.40 |
| Energy                   | 45.0 (25.0, 60.0) | 40.0 (30.0, 60.0) | 0.0 (-5.0, 10.0) | 0.62 |
| Overall Health           | 50.0 (40.0, 50.0) | 50.0 (40.0, 50.0) | 0.0 (0.0, 0.0)   | 0.48 |
| SF-12 Physical Composite | 32.7 (27.5, 41.1) | 31.7 (25.9, 39.3) | 1.7 (-1.2, 4.5)  | 0.24 |
| SF-12 Mental Composite   | 45.2 (37.9, 51.7) | 42.9 (35.5, 55.8) | 0.2 (-3.6, 3.8)  | 0.89 |

<sup>a</sup>QIDS-C<sub>16</sub> denotes the 16-item Quick Inventory of Depressive Symptomatology-Clinician rated scale (scores range from 0 to 27, with higher scores indicating a greater severity of depressive symptoms).

<sup>b</sup>CKD is defined as an estimated glomerular filtration rate (eGFR) <60 mL/min/1.73m<sup>2</sup>.

<sup>c</sup>WSAS, Work and Social Adjustment Scale.

<sup>d</sup>KDQOL-SF 1.3, Kidney Disease Quality of Life Survey Version 1.3. Raw scores are transformed to a 0-100 scale, where higher numbers signify more favorable QOL.
